# Supplementary material
Source: PubMed Central journal article supplement (PMC5746454)

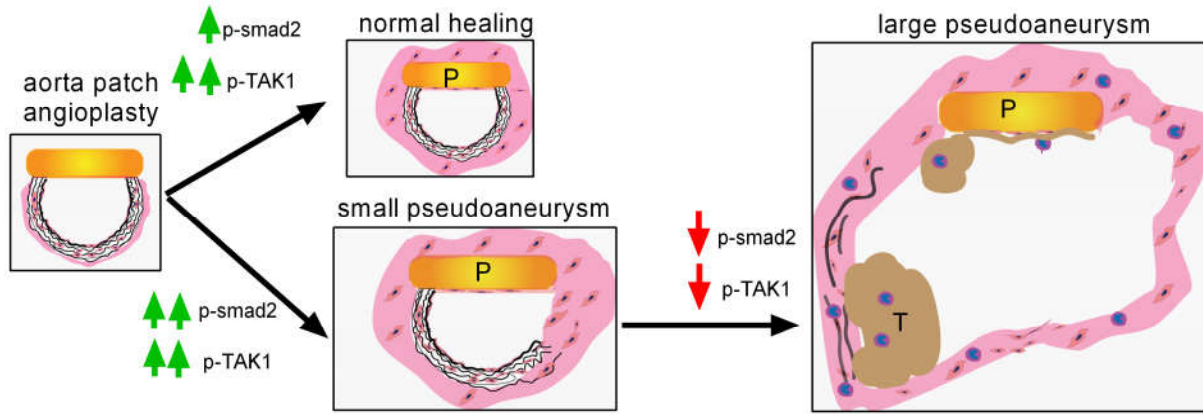

Supplement: NIHMS918837-supplement-Graphic_abstract.pdf [file NIHMS918837-supplement-Graphic_abstract.pdf]
